# Supplementary material
Source: Springer Nature journal article supplement (https://www.springermedizin.de/resource/supplementary/12948_2012_107_MOESM1_ESM.pdf/9556958)

**A**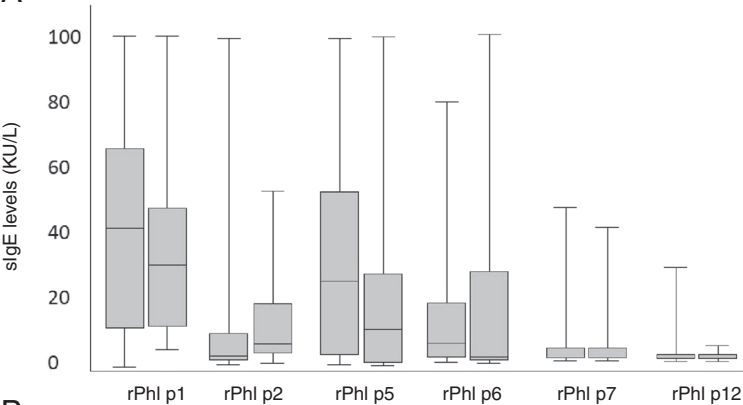**B**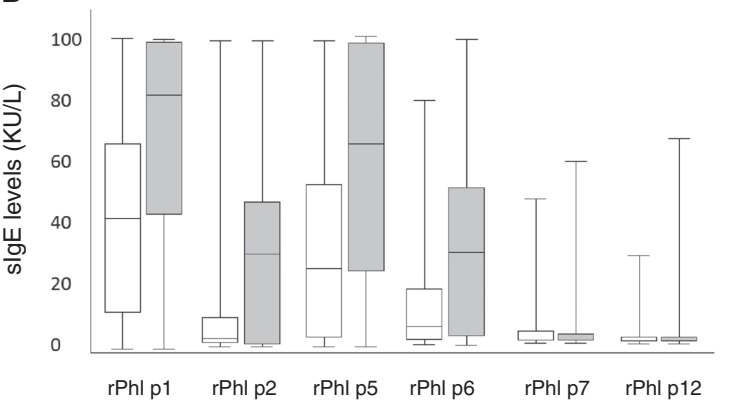**C**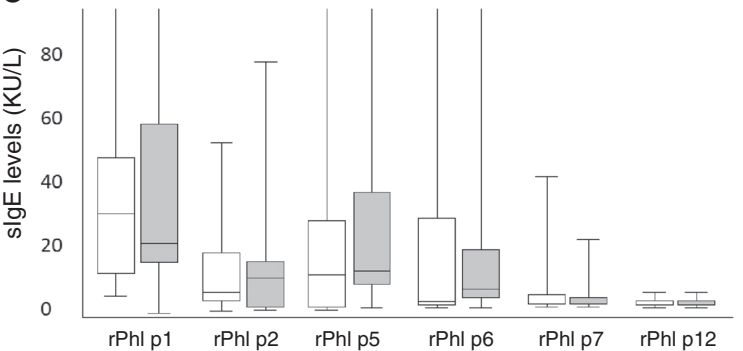

 Before pollen season  
 After pollen season

Supplement: MOESM1 [file 9556958]
